# Supplementary material
Source: Springer Nature journal article supplement (https://www.springermedizin.de/resource/supplementary/12935_2011_344_MOESM1_ESM.pdf/9540350)

Cell Counts

79

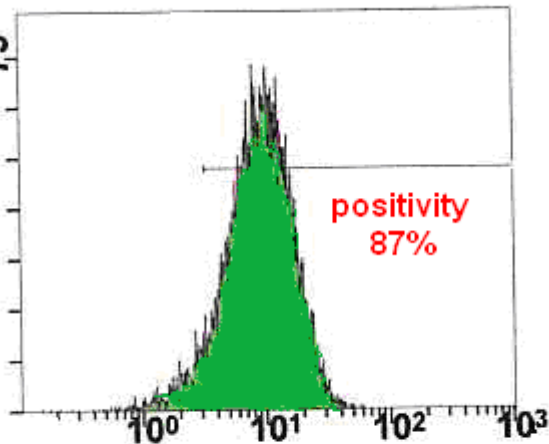

CD24 (FITC)

Supplement: MOESM1 [file 9540350]
